# Supplementary material
Source: publisher figshare collection journal article supplement (https://geolsoc.figshare.com/ndownloader/files/17992238)
Supplement: Supplementary file 1 [file 17992238]

**Table S3.**  *Carbon and oxygen isotope composition of calcitic bivalve shells from the Bathonian, Tithonian and Campania of the Saratov-Samara area.*

*H – height of the shell.*

| **Sample** | **Shell** | **Species (locality,, zone) (zone)** | **Location**  **(H, in mm)** | **Diagenetic alterations** | | | | **d13C**  **(VPDB)**  **‰** | **d18O**  **(VPDB)**  **‰** | **ToC** |
| --- | --- | --- | --- | --- | --- | --- | --- | --- | --- | --- |
|  | **Calcite**  **%** | **a-SiO2**  **%** | **Colour** |
| **768-1** | 768 | *Pernostrea* sp. (Sokur, lower Bathonian, *besnosovi* Zone) | H = 32.5 |  | 100 | No | Silvery-white | 2.8 | -3.8 | 28.7 |
| **770-1** | 770 | *Pernostrea* sp. (Sokur, lower Bathonian, *besnosovi* Zone) | H = 62.0 |  | 100 | a-SiO2  (traces) | Silvery-white | 3.3 | -3.6 | 27.7 |
| **16-2/347-1** | 16-2/347 | *Buchia* sp..*,* fragments Marevka-2, upper Volgian,  *nodiger* Zone) | H>14.0 |  | 100 | a-SiO2  (traces),  apatite  (traces) | White | 0.1 | -4.6 | 32.6? |
| **15-2/392-2** | 15-2/392 | *Buchia* sp.*,* fragments Marevka-1, middle Volgian,  *nikitini* Zone) | H = 13-17 |  | 100 | a-SiO2  (traces),  apatite  (traces) | Cream | -0.1 | -4.1 | 30.1? |
| **15-3/418-1** | 15-3/418 | *Buchia* sp.*,* fragments Marevka-1, upper Volgian,  *fulgensi* Zone) | H = 8-22.0 |  | 100 | a-SiO2  (traces),  apatite  (traces) | Cream | 0.4 | -3.8 | 28.7? |
| **14-2/456-1** | 14-2/456 | *Buchia* sp.*,* fragments Kashpir, middle Volgian,  *nikitini* Zone) | 13.0 |  | - | - | Silvery-white | -0.6 | -4.3 | 31.1 |
| **14-2/456-2** | Same shell | Same | 26.0 |  | 100 | No | Silvery-white | -0.6 | -4.3 | 31.1 |
| **14-2/456-3** | Same shell | Same | 32.2 |  | 100 | a-SiO2  (traces) | Silvery-white | 0.0 | -3.2 | 25.8 |
| **14-2/456-4** | Same shell | Same | 42.0 |  | 100 | No | Silvery-white | 0.2 | -4.5 | 32.1 |
| **14-2/460-1** | Sample  14-2/460  (the six bivalve  shells and  one belemnite  rostrum) | *Buchia* sp*.,*  Kashpir, middle Volgian,  *nikitini* Zone) | 15.0 |  | 100 | a-SiO2  (traces) | Cream | 0.3 | -5.4 | 36.7 |
| **14-2/460-2** | Same sample | Same | 31.0 |  | 100 | No | Cream | 0.1 | -5.8 | 39.3 |
| **14-2/460-3** | Same sample | Same | 25.0 |  | 100 | a-SiO2  (traces) | Camre | 0.4 | -3.9 | 29.1 |
| **14-2/460-4** | Samesample | Same | 25.3 |  | 100 | No | Cream | -0.4 | -4.4 | 31.6 |
| **14-2/460-5** | Samesample | Same | 20.0 |  | 100 | No | Cream | 0.7 | -4.4 | 34.4 |
| **14-2/460-6** | Same sample | Same | 42.0 |  | 100 | No | Cream | -0.4 | -5.8 | 39.3 |
| **14-2/460-7** | Same sample | Same | 26.0 |  | 100 | No | Cream | 0.3 | -5.3 | 36.1 |
| **14-2/460-8** | Same sample | Same | 18.0 |  | 100 | a-SiO2  (traces) | Cream | -1.3 | -4.8 | 33.6 |
| **14-2/460-9** | Same sample | Same | 23.0 |  | 100 | No | Cream | -0.3 | -5.9 | 39.8 |
| **14-2/460-10** | Same sample | Same | 25.0 |  | 100 | No | Cream | 0.4 | -5.3 | 36.6 |
| **14-2/460-11** | Same sample | Same | 30.0 |  | 100 | a-SiO2  (traces) | Cream | 0.8 | -5.0 | 34.6 |
| **14-2/460-12** | Same sample | Same | 35.0 |  | 100 | a-SiO2  (traces) | Cream | 1.1 | -4.2 | 30.6 |
| **14-2/460-13** | Same sample | Same | 39.0 |  | 100 | a-SiO2  (traces) | Cream | 1.0 | -3.5 | 27.2 |
| **14-2/460-14** | Same sample | Same | 42.0 |  | 100 | a-SiO2  (traces) | Cream | 0.9 | -3.6 | 27.7 |
| **11-1/540-1** | 11-1/540 | *Buchia* sp*.,*  Zavodskojr, middle Volgian,  *nodiger* Zone) | 13.0 |  |  | a-SiO2  (traces) | Silvery-cream | -0.7 | -3.4 | 26.8 |
| **5-3/576-1** | 5-3/576 | Inoceramid bivalve, fragment, prismatic layer, (Krasnyj Oktyabr, lower Campanian (upper part) | - |  | 100 | a-SiO2  (traces) | White | 4.5 | -0.6 | 14.3 |
